# Supplementary material
Source: PubMed Central journal article supplement (PMC2819222)
Supplement: NIHMS170937-supplement-Supplementary_Data.pdf [file NIHMS170937-supplement-Supplementary_Data.pdf]

## Reprogramming of Pancreatic $\beta$ Cells into Induced Pluripotent Stem Cells

Matthias Stadtfeld, Kristen Brennand,  
and Konrad Hochedlinger

### Supplemental References

- S1. Stadtfeld, M., Maherali, N., Breault, D.T., and Hochedlinger, K. (2008). Defining molecular cornerstones during fibroblast to iPS cell reprogramming in mouse. *Cell Stem Cell* 2, 230–240.

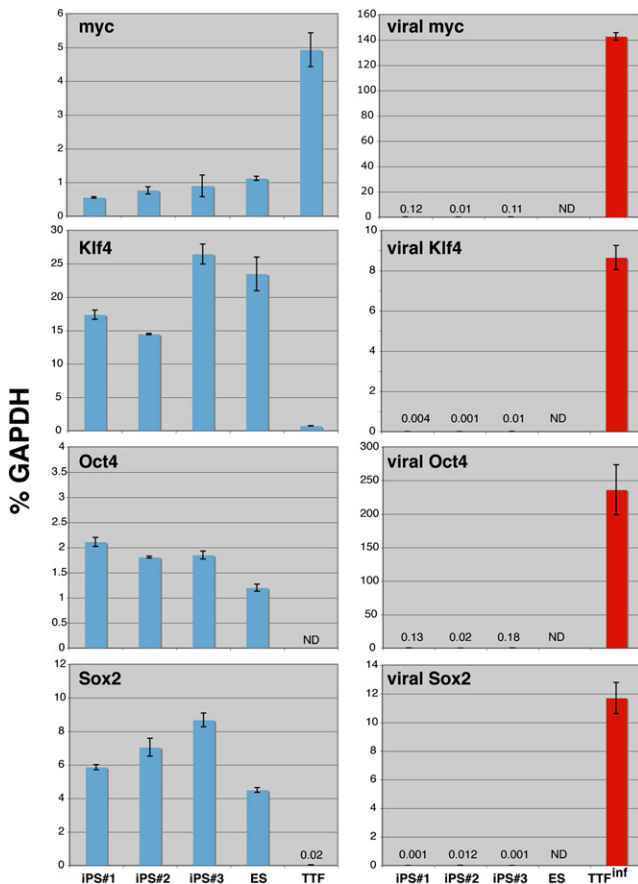

Figure S1. qPCR Analysis of  $\beta$  iPS

Bar diagrams show the expression of endogenous (blue) and viral (red) expression levels of *c-myc*, *Klf4*, *Oct4*, and *Sox2* relative to GAPDH in three  $\beta$  iPS clones cultured in the absence of doxycycline, V6.5 ESCs, RIP-Cre/*lacZ* tail-tip fibroblasts (TTFs), and TTFs expressing rTA from the ROSA26 locus [S1] infected with the respective inducible lentiviruses (TTF<sup>inf</sup>) and cultured in the presence of doxycycline. Error bars indicate one standard deviation. “ND” stands for not detected.

Table S1. Primers Used for qPCR

| Gene                | Forward Primer (5' to 3') | Reverse Primer (5' to 3') |
|---------------------|---------------------------|---------------------------|
| <i>Myc</i>          | TAACTCGAGGAGGAGCTGGA      | GCCAAGGTTGTGAGGTTAGG      |
| <i>Klf4</i>         | AACATGCCCGGACTTACAAA      | TTC AAGGAATCCTGGTCTTC     |
| <i>Oct4</i>         | TAGGTGAGCCGTCTTTCCAC      | GCTTAGCCAGGTTTCGAGGAT     |
| <i>Sox2</i>         | AGGGCTGGGAGAAAGAAGAG      | CCGCGATTGTTGTGATTAGT      |
| <i>Myc (viral)</i>  | AAGAGGACTTGTTCGGAAA       | TTGTAATCCAGAGGTTGATTATCG  |
| <i>Klf4 (viral)</i> | ATGGTCAAGTCCAGCAAG        | TGATATCGAATCCGTTTGTTC     |
| <i>Oct4 (viral)</i> | GCTCGTTTAGTGAACCGTCAG     | CGAAGTCTGAAGCCAGGTGT      |
| <i>Sox2 (viral)</i> | GGCCATTAACGGCACACT        | AAGCAGCGTATCCACATAGC      |
| <i>GAPDH</i>        | AGGTCGGTGTGAACGGATTG      | TGTAGACCATGTAGTTGAGGTCA   |
